# Supplementary material for: In silico study to identify novel NEK7 inhibitors from natural source by a combination strategy
Source: Research Square preprint supplement (doi:10.21203/rs.3.rs-3217217/v1), 2023-08-07
Supplement: Supplementary file 1 [file 78c8f67cef9e2c8af549e3f1.docx]

**Table 2.** Comprehensive molecular docking results of the reference dabrafenib and top-hit natural compounds.

| **Compound name** | **Structure** | **Semi-flexible docking score** | **Flexible docking score** | **Interacting residues** | **H-bond** | **H-bond number** |
| --- | --- | --- | --- | --- | --- | --- |
| **Dabrafenib** | 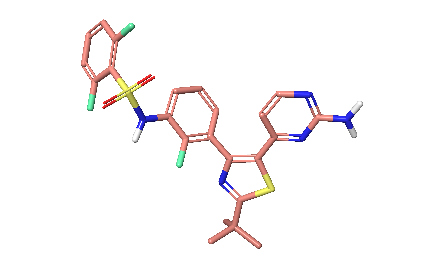 | -8.909 | -9.071 | Lys38, Ile40, Gly41, Arg42, Gly43, Ser46, Val48, Ala61, Ile95, Leu111, Glu112, Leu113, Ala114, Asp115, Gly117, Arg121, Phe168, and Asp179 | **ILE40, GLU112** | 2 |
| **Scutellarin** | 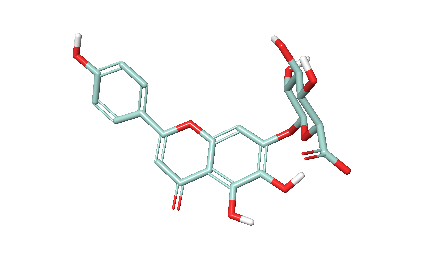 | -10.016 | -11.547 | Ile40, Gly41, Arg42, Gly43, Gln44, Phe45, Ser46, Val48, Ala61, Lys63, Ile95, Leu111, Glu112, Leu113, Ala114, Asp115, Lys163, Phe168, Asp179, Leu 180, and Thr199 | **GLN44, SER46, GLU112, ALA114, ASP179, LEU180** | 6 |
| **Digallic acid** | 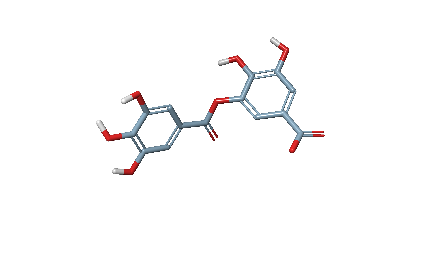 | -11.684 | -13.059 | Ile40, Val48, Ala61, Ile95, Leu111, Glu112, Leu113, Ala114, Asp115, Lys163, Asn166, Phe168, Gly178, Asp179, Leu 180, and Thr199 | **GLU112, ALA114, LYS163, ASN166, ASP179** | 6 |
| **(-)-Balanol** | 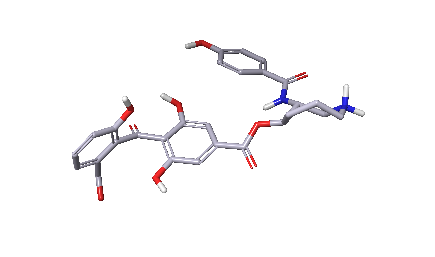 | -12.319 | -15.054 | Ile40, Gly41, Arg42, Gly43, Gln44, Phe45, Ser46, Val48, Ala61, Lys63, Ile95, Leu111, Glu112, Leu113, Ala114, Asp115, Gly117, Asp118, Arg121, Lys163, Phe168, Gly178, Asp179, Leu 180, and Thr199 | **PHE45, SER46, ALA114, ASP115, ASP179** | 7 |
