# Supplementary material for: In silico study to identify novel NEK7 inhibitors from natural source by a combination strategy
Source: Research Square preprint supplement (doi:10.21203/rs.3.rs-3217217/v1), 2023-08-07
Supplement: Supplementary file 2 [file 94c250c4cc8536e5958304bd.docx]

**Table 3.** Predicted physiochemical and druglikeness properties of the reference dabrafenib and top-hit natural compounds.

| **Molecular property** | **Dabrafenib** | **Scutellarin** | **Digallic acid** | **(-)-Balanol** |
| --- | --- | --- | --- | --- |
| nHA a | 7 | 12 | 9 | 12 |
| nHD b | 3 | 7 | 6 | 7 |
| nRot c | 6 | 4 | 4 | 9 |
| TPSA d | 111.59 | 207.35 | 164.75 | 202.72 |
| Molecular Weight | 519.1 | 462.08 | 322.03 | 550.16 |
| logP e | 4.15 | 0.751 | 1.352 | 3.253 |
| Lipinski rulef | Accepted | Rejected | Accepted | Rejected |

**a** Number of hydrogen bond acceptors. **b** Number of hydrogen bond donors. **c** Number of rotatable bonds. **d** Topological polar surface area. **e** Log of the octanol/water partition coefficient. **f** If two properties are out of range, a poor absorption or permeability is possible, one is acceptable.
